- a comparison of two populations under different risks from predation. *Copeia* 3:649–656.
- RICKLEFS, R. E. 1969. An analysis of nesting mortality in birds. *Smithsonian Contributions to Zoology* 9:1–48.
- ROTH, R. R., M. S. JOHNSON, AND T. J. UNDERWOOD. 1996. Wood Thrush (*Hylocichla mustelina*). In A. Poole and F. Gill [EDS.], *The birds of North America*, No. 284. The Academy of Natural Sciences, Philadelphia, PA, and The American Ornithologists' Union, Washington, DC.
- SASVARI, K., AND Z. HEGYI. 2000. Avian predators influence the daily time budget of lapwings *Vanellus vanellus*. *Folia Zoologica* 49:211–219.
- SCHMIDT, K. A. 1999. Foraging theory as a conceptual framework for studying nest predation. *Oikos* 85:151–160.
- SCHMIDT, K. A., AND R. S. OSTFELD. 2003. Songbird populations in fluctuating environments: nest predator responses to pulsed resources. *Ecology* 84:406–415.
- SCHMIDT, K. A., AND C. J. WHELAN. 1999. Nest predation on woodland songbirds: when is nest predation density dependent? *Oikos* 87:65–74.
- SCHMIDT, K. A., J. GOHEEN, R. NAUMANN, R. S. OSTFELD, E. M. SCHAUBER, AND A. BERKOWITZ. 2001. Experimental removals of strong and weak predators: mice and chipmunks preying on songbird nests. *Ecology* 82:2927–2936.
- SEALY, S. G. 1994. Observed acts of egg destruction, egg removal, and predation on nests of passerine birds at Delta Marsh, Manitoba. *The Canadian Field-Naturalist* 108:41–51.
- SLACK, R. D. 1976. Nest-guarding behavior by male gray catbirds. *Auk* 93:292–300.
- SYSTAT. 2000. *Statistics*. Version 10.0. SPSS, Inc., Chicago.
- WALTON, L. M. 1994. Determinants of parental roles of Wood Thrushes at the nest. B.Sc. thesis, University of Delaware, Newark, DE.
- WHELAN, C. J., M. L. DILGER, D. ROBSON, N. HALLYN, AND S. DILGER. 1994. Effects of olfactory cues on artificial-nest experiments. *Auk* 111:945–952.
- WOODWARD, J. D., AND M. T. MURPHY. Sex roles, parental experience and reproductive success of eastern kingbirds, *Tyrannus tyrannus*. *Animal Behavior* 57:105–115.

*The Condor* 107:144–150  
© The Cooper Ornithological Society 2005

## ULTRAVIOLET BEAK SPOTS IN KING AND EMPEROR PENGUINS

PIERRE JOUVENTIN<sup>1,4</sup>, PAUL M. NOLAN<sup>2</sup>, JONAS ÖRNBORG<sup>3</sup> AND F. STEPHEN DOBSON<sup>2</sup>  
<sup>1</sup>C.N.R.S.—C.E.F.E, *Equipe Ecologie Comportementale*, 34293 Montpellier, France  
<sup>2</sup>Dept. of Biological Sciences, Auburn University, Auburn, AL 36849  
<sup>3</sup>Dept. of Zoology/Animal Ecology, Göteborg University, 405 30 Göteborg, Sweden

**Abstract.** In seabirds, colors of feathers and external tissues have only recently been studied, and ultraviolet (UV) color has not yet been detected. Using live individuals as well as museum skins, we found UV peaks of reflectance in two large *Aptenodytes* species, King (*A. patagonicus*) and Emperor (*A. forsteri*) Penguins. UV reflectance did not occur on the feathers, claws, or skin of these species, nor did we find UV reflectance in five other genera of penguins (11 species). UV peaks overlapped with spots of color on the lower beak that appeared orange for human observers, and beak spots differed slightly in location between the two species. Adults of both sexes possessed these UV markings, but they were lacking in juveniles, as was the orange color of the beak spot, and auricular patches used for selecting mates. Finally, measure-

ments of free-ranging King Penguins showed that recently paired birds had higher UV reflectance than courting ones, suggesting possible roles of UV beak spots in pairing and as an indicator of sexual maturity.

**Key words:** *Aptenodytes*, *mate choice*, *ornament*, *penguin*, *ultraviolet reflectance*.

Manchas Ultravioleta en el Pico de los Pingüinos *Aptenodytes patagonicus* y *A. forsteri*

**Resumen.** En las aves marinas, los colores de las plumas y los tejidos externos sólo han sido estudiados recientemente, y el color ultravioleta (UV) todavía no se ha detectado. En individuos vivos así como en pieles de museo, nosotros encontramos picos de reflectancia UV en dos especies de pingüinos, *Aptenodytes patagonicus* y *A. forsteri*. El color UV no se encontró en las plumas, las garras o la piel de estas especies, ni encontramos color UV en otros cinco géneros de pin-

Manuscript received 27 May 2004; accepted 28 October 2004.

<sup>4</sup> E-mail: jouvernin@cefe.cnrs-mop.fr

güinos (11 especies). Los puntos UV se encontraban superpuestos con manchas de color ubicadas en la parte baja del pico que parecían anaranjadas para los observadores humanos. Las manchas del pico difirieron levemente en forma y localización entre las dos especies. Los adultos de ambos sexos presentaron las manchas UV, pero éstas no estaban presentes en los juveniles, al igual que el color anaranjado de la mancha del pico y los parches auriculares empleados en la selección de parejas. Medidas tomadas en individuos libres de la especie *A. patagonicus* demostraron que los que se habían apareado recientemente tenían presentaban reflectancias de UV mayores que las de aquellos que aún estaban cortejando, lo que sugiere un posible papel de las manchas UV del pico en el apareamiento y como indicadoras de la madurez sexual.

A substantial part of the visual color spectrum of birds is not visible to the human eye, specifically the ultraviolet region (UV, wavelengths of 320–400 nm; Bennett and Cuthill 1994, Cuthill et al. 2000b). Whereas mammals have three types of cone receptors to perceive colors, most birds have four types of cones, including one that is sensitive to ultraviolet light (Chen et al. 1984). Ultraviolet plumage reflectance has been found in a number of avian species (Eaton and Lanyon 2003). Although UV does not seem to be more important than other regions of the avian-visual spectrum (Hunt et al. 2001, Maddocks et al. 2001), together with other wavelengths, UV reflectance has been shown to play an important role in tasks such as mate choice (Hausmann et al. 2003), and prey detection and foraging (Johnsen et al. 1998, Sheldon et al. 1999, Cuthill et al. 2000a, Maddocks et al. 2002, Siitari and Huhta 2002) in several different bird species.

Color patterns of terrestrial birds have been well studied, but there is little research on seabird coloration (Jones and Hunter 1993, Cuthill et al. 2000a). A number of studies have identified UV reflectance from skin or scales in fish and lizards (Endler 2000), but there are only a few examples of birds having distinct UV reflectance from horned beak tissues (Hunt et al. 2003, Peters et al. 2004). Penguins, although poorly known, are ideal for a study of color because of their variation in color patterns; some species exhibit strikingly colored feathers and bill spots, while others do not. Because they are relatively unafraid of observers, penguins are easy to study, including taking measurements, and manipulating color patterns. One of the first studies to experimentally manipulate penguin plumage found striking results; the removal of colored feathers resulted in bachelor males having difficulty acquiring a mate (Jouventin 1982). Also, colored plumage of the Yellow-eyed Penguin (*Megadyptes antipodes*) has recently been found to be related to age, body condition, and breeding success (Massaro et al. 2003).

Plumage color is produced by either the deposition of pigments ingested in the diet, synthesized from dietary precursors, or on a precisely ordered nanostructure that reflects UV light (Shawkey et al. 2003). It is widely accepted that pigment-based coloration can signal body and breeding condition (Hill 1991, Veiga 1993) and recent evidence shows that structural colors are linked to diet quality (Keyser and Hill 1999, Shel-

don et al. 1999, Doucet 2002). Thus, colored ornaments may indicate the quality (i.e., its future capacity to feed and rear young) of the signaling bird.

In the present study, we examined species-specific UV reflectance of plumage and horny tissues from museum skins of the penguin family (Spheniscidae). We tested birds of both sexes and all age classes for the presence of UV reflectance. We took the same measurements from a captive population of King Penguins and compared their UV reflectance with that of the museum skins. We focused on one genus (*Aptenodytes*) comprising two species, the King (*A. patagonicus*) and Emperor (*A. forsteri*) Penguins, that breed on sub-Antarctic islands and on the edge of the Antarctic continent, respectively. At ~1-m high and 10–40 kg, individuals of these species are the largest seabirds. Both species exhibit a beak spot on both sizes of the lower mandible that appears orange (with variations among individuals from yellow to red). We describe UV reflectance from these beak spots, and present field measurements that suggest a possible signal function of this UV reflectance. In a separate field study, we compared the beak spots of nonpaired (courting) and paired (mated) adult King Penguins, to investigate the possible signaling function of these UV-reflecting markings during mate choice.

## METHODS

### MEASUREMENTS OF MUSEUM SKINS AND CAPTIVE BIRDS

We used a spectrometer to examine reflectance from 45 skins (13 species from six genera, if we consider Southern and Northern Rockhopper Penguins as distinct species) in the National Museum of Natural History (Paris, France) on 19 September 2002 and 24 March 2003 (Table 1). Most birds were collected 30 years ago in the French Austral and Antarctic Territories. We measured spectral reflectance from feathers (white, black and colored) as well as horned skins (foot, claw, upper and lower mandible) for all species. For a more detailed investigation of coloration, we measured nine adult King Penguins, 10 adult Emperor Penguins, 10 juvenile King Penguins, and four juvenile Emperor Penguins. We also measured an additional seven live King penguins (six males, one female) on 23 March 2003 that were held in captivity at Océanopolis-Brest.

Reflectance measurements were made on penguins with a USB2000 spectrometer (Ocean Optics), equipped with a PX2 pulsed-xenon flash, and calibrated against a white standard (WS-2 Spectralon, Ocean Optics) with a resolution of 0.3 nm across the spectral range of 300–700 nm. We took measurements using a fiber-optic cable held at a 90° angle to the area of interest. We collected 3 to 5 measurements for each area, whether plumage or horny tissue, removing the probe between each measurement. We used nonparametric (Wilcoxon) tests to compare the spectral frequency at the point of highest reflectance in the UV range, and to compare proportional reflectance at the UV peak for museum specimens and live King Penguins, and for paired and unpaired King Penguins. Data are presented as mean  $\pm$  SD.

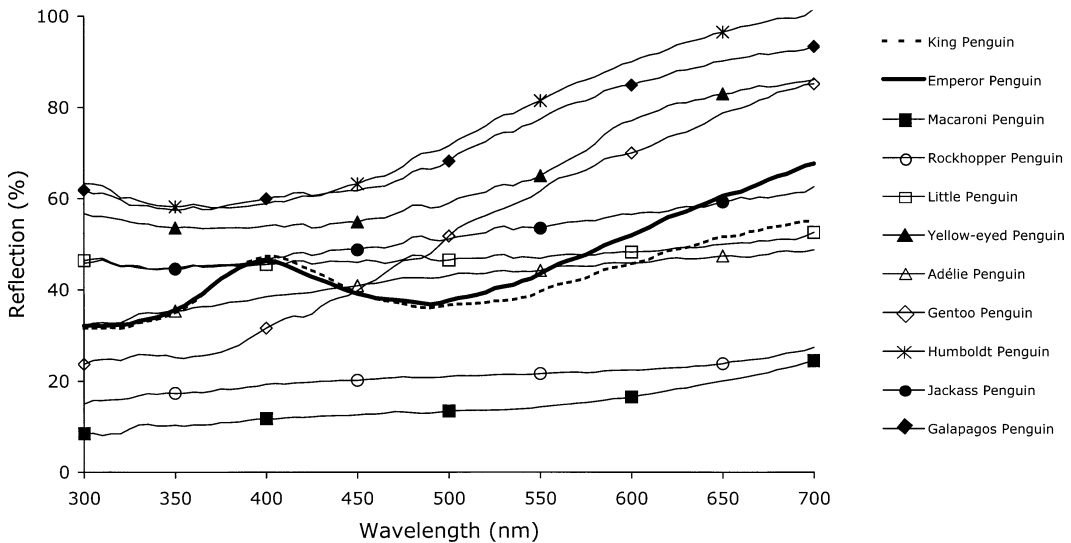

FIGURE 1. Spectral reflectance curves for the lower mandible of 11 penguin species; only the King (*Aptenodytes patagonicus*) and the Emperor (*A. forsteri*) showed distinct UV reflectance (320–400 nm).

#### FIELD MEASUREMENTS

We captured 57 adult King Penguins on Possession Island (46°25'S, 51°45'E) in the Crozet Archipelago (Indian Ocean), in a 2-week period in early January 2002. We identified adults by their orange auricular feathers and beak spots. “Nonpaired” birds ( $n = 23$ ) were identified by their early nuptial displays (nuptial call), and by their association with a location on the beach where most mating occurs. “Paired” birds ( $n = 34$ ) were identified by their late nuptial displays (“face-to-face”, “bill clapping”, “waddling gait”, Jouventin 1982), and by their location in the brooding part of the colony. We captured an additional 134 individuals between mid-November 2001 and mid-January 2002 for which pairing status was unknown.

For all captured penguins, we took two measurements of the color of the beak spot at its widest point near the base of the beak using a Colortron (X-rite, Grandville, Michigan) portable reflectance spectrometer and averaged the measurements using Colorshop software (X-Rite, Grandville, Michigan). A Colortron spectrometer relies on twin tungsten light sources and daily calibrations against factory-supplied absolute black and absolute white standards to attain 10 nm resolution.

The Colortron is sensitive across human-visible wavelengths and partially into the UV range of bird vision (390–700 nm); so we used percent reflectance at 400 nm as an index of peak UV reflectance of wild penguins. From King Penguins measured in captivity, the correlation between reflectance at 400 nm (Colortron) and peak UV reflectance (Spectrometer) was strong ( $r = 0.87$ ,  $n = 7$ ,  $P = 0.03$ ). Thus, we are confident that this technique provided a reasonable and accurate measurement to compare courting and paired birds.

#### RESULTS

##### MUSEUM SPECIMENS AND CAPTIVE BIRDS

Of the 13 penguin species investigated (table 1), we show the reflectance curves for 11 of these species (Fig. 1). Some species such as the Gentoo Penguin (*Pygoscelis papua*) or all the crested Penguins (*Eudyptes* genus) show a colored beak, but only beak spots of the Emperor Penguin and King Penguin (*Aptenodytes* genus) exhibited a reflectance peak in the UV. Beak spots extended forward of the posterior end of the beak (Fig. 2). Beak spots of Emperor Penguins were closer to the top of the beak (where the two mandibles join) and were broader than those of King Penguins.

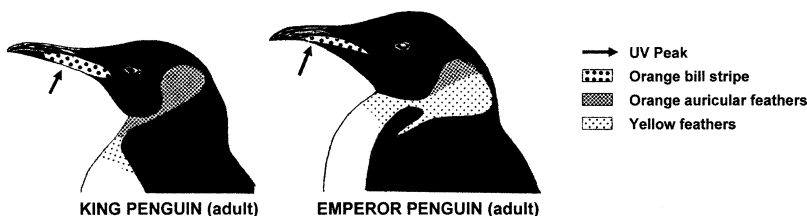

FIGURE 2. The precise location of UV reflectance on the lower orange part of the beak differs between Emperor and King Penguins. Colored auricular and breast feathers are also indicated.

Visual inspection of the reflectance graphs from the other 11 penguin species showed no distinct UV peak reflectance (Table 1). We found no distinct peak of UV reflection from any other color patch, including white feathers on the throat, black feathers on the back, colored feathers on the breast, stomach, throat, and auricular patches (orange-yellow in large penguins), black horny tissue of the beak, or on the claw or the black skin of the foot. Chicks and juveniles showed no UV reflectance on the beak (Fig. 3a), however, the superficial tissue on the lower mandible (the orange-colored beak spot) of adult large penguins was reflective in the UV (Fig. 3c). UV reflectance peaks were also absent in molting birds (Fig. 3d), but the sample size was too small ( $n = 2$ ) to be conclusive.

From comparing King Penguin beak spots from museum skins with captive live birds (Fig. 3b), we found that peak UV reflectance was 13% greater in living birds ( $59\% \pm 4\%$  in live birds and  $46\% \pm 4\%$  in museum skins; Wilcoxon test,  $z = 3.3$ ,  $P = 0.001$ ,  $n = 7$ , 9 live and museum birds, respectively). The wavelength of the UV peak (otherwise referred to as hue) varied within the same species, when comparing living birds and museum skins: live King Penguins reflected at  $380 \pm 1$  nm, while museum specimens reflected at  $401 \pm 2$  nm (Wilcoxon test,  $z = 3.3$ ,  $P = 0.001$ ,  $n = 7$ , 9 live and museum skins, respectively).

#### FIELD MEASUREMENTS

In our field measurements of beak UV reflectance, we compared courting birds ( $n = 34$ ) to those individuals already mated ( $n = 23$ ). Our index of UV reflectance (at 400 nm, see methods) was higher among paired King Penguins than among courting birds (means  $63\% \pm 10\%$ , and  $54\% \pm 12\%$ , respectively; Wilcoxon test,  $z = 2.9$ ,  $n = 34$ , 23,  $P < 0.01$ ). In addition, we found that males and females did not differ significantly in UV reflectance (means  $65\% \pm 12\%$  SD, and  $61\% \pm 10\%$ , respectively, Wilcoxon test,  $z = 0.8$ ,  $n = 17$ , 17,  $P = 0.41$ ).

#### DISCUSSION

We know that at least one penguin species (*Spheniscus humboldti*) is able to detect UV reflectance, as are most species of birds studied to date (Chen et al. 1984, Bowmaker and Martin 1985). Although UV reflectance has been found in a variety of species (Finger and Burkhardt 1994, Andersson 1996), only a few recent studies have shown UV reflectance from the horned parts such as the beak (Hunt et al. 2003, Peters 2004). Nonetheless, although it is likely that UV reflectance of beak spots is perceived by *Aptenodytes* penguins (see below), the function of this reflectance is unclear.

It is unlikely that these UV spots are adaptations to life at sea because UV light decreases rapidly below the surface of the water (Bradbury and Vehrencamp 1998). Depths of King Penguin dives are up to more than 300 m and Emperor Penguins dive deeper than 400 m (Kooyman et al. 1992, Kooyman and Kooyman 1995) where UV, as well most other wavelengths of light, may be virtually absent. On the water surface, it is possible that UV-reflecting beak spots may be used in species-specific identification. Beak spots might function in a similar manner as contact calls, used to find congeners at sea (Jouventin 1982), particularly

when penguins hunt in single-species groups (Tremblay and Chérel 1999). For birds at sea, however, distinguishing species using beak spots would be difficult, and we have no specific evidence to support this function.

UV ornaments could play a role in pairing of breeding males and females, as an indicator of sexual maturity, or in mate choice (either intrasexual competition or intersexual selection). We measured only a small part of the UV range, thus our comparison between mated and nonmated penguins can only be considered a preliminary examination of the signaling function of UV beak reflectance during pairing. However, further study using a spectrometer recently confirmed the results of our Colortron measurements (Jouventin et al. in press), and supported our finding that UV reflectance of beak spots did not differ between male and female King Penguins, and did not appear until individuals mature sexually (Nicolaus, Nolan, and Jouventin, unpubl. data).

An increasing number of studies of birds indicate the importance of coloration (including UV) in intersexual signaling (Bennett et al. 1996, Johnsen et al. 1998), and this likely applies to penguins as well (Jouventin 1982, Massaro et al. 2003). In addition, auricular patches of orange feathers, as well as beak spots, are prominently exposed as the head and neck are used during behavioral displays associated with pairing in King and Emperor Penguins (Jouventin 1982). Nuptial displays have been described in several species of penguins, and King and Emperor Penguins share several similarities associated with these displays: colorful head feathers and beak of adults, but muted or lacking coloration in sub-adults, and the use of highly-ritualized postures that exhibit the head ("face-to-face", Jouventin 1982). These similarities imply that colored feather patches as well as UV and orange colors of beak spots are good candidates for a role as optical signals.

The lower mandibles of King and Emperor Penguins are not only UV reflective, but also orange in color. The short-wave peak is close to the maximum sensitivity of the SWS1 visual pigment (VS cone) of penguins (ca. 405 nm, Bowmaker and Martin 1985, Wilkie et al. 2000, Ödeen and Håstad 2003). It is unclear if UV reflectance is a specific signal, or complementary to the orange coloration of lower mandibles. In addition, more than one color trait might influence pairing. For example, King Penguins have orange patches of auricular feathers that likely play a role in mate choice (Jouventin 1982, Jouventin et al., in press). A specific UV influence is not demonstrated by our association of UV reflectance of the beak spot and whether an individual was paired, because all wavelengths of light are present and perhaps visible to penguins. Consequently, additional measurements and sophisticated field experiments will be necessary to further investigate these UV peaks on the beak spots of penguins.

We thank Guy Lecorvec and Jean-Marc Pons for access to museum specimens at the Muséum National d'Histoire Naturelle de Paris (MNHN). At Océanopolis de Brest, we thank Eric Hussenot, Sami Hassani, Jean-Yves Leclach, and Christine Dumas for their cooper-

TABLE 1. Results of spectrometer measurements from different body areas and plumage (black, white, and colored) from museum specimens of 13 different penguin species.

| Species                                                           | Age class        | Locality                         | Measurement locations                                                                           | Presence of a UV peak | Sample size |
|-------------------------------------------------------------------|------------------|----------------------------------|-------------------------------------------------------------------------------------------------|-----------------------|-------------|
| King Penguin ( <i>Aptenodytes patagonicus</i> )                   | adult            | Kerguelen Is. (Indian Ocean)     | white & black feathers, black skin (foot & claw), black part of beak, orange auricular feathers | No                    | 9           |
|                                                                   | adult            | Kerguelen Is. (Indian Ocean)     | orange spot on lower mandibles                                                                  | Yes                   | 9           |
|                                                                   | juvenile & chick | Kerguelen Is. (Indian Ocean)     | beak                                                                                            | No                    | 10          |
| Emperor Penguin ( <i>Aptenodytes forsteri</i> )                   | adult            | Terre Adélie (Antarctica)        | white & black feathers, black skin (foot & claw), black part of beak, yellow auricular feathers | No                    | 10          |
|                                                                   | adult            | Terre Adélie (Antarctica)        | orange spot on lower mandibles                                                                  | Yes                   | 10          |
|                                                                   | juvenile & chick | Terre Adélie (Antarctica)        | beak                                                                                            | No                    | 4           |
| Adélie Penguin ( <i>Pygoscelis adeliae</i> )                      | adult            | Terre Adélie (Antarctica)        | feathers, feet, beak                                                                            | No                    | 2           |
| Gentoo Penguin ( <i>Pygoscelis papua</i> )                        | adult            | Crozet Is. (Indian Ocean)        | feathers, feet, beak                                                                            | No                    | 2           |
| Chinstrap Penguin ( <i>Pygoscelis antarctica</i> )                | adult            | Terre Adélie (Antarctica)        | feathers, feet, beak                                                                            | No                    | 2           |
| Macaroni Penguin ( <i>Eudyptes chrysolophus</i> )                 | adult            | Crozet Is. (Indian Ocean)        | feathers, feet, beak                                                                            | No                    | 2           |
| Subantarctic Rockhopper ( <i>Eudyptes chrysocome chrysocome</i> ) | adult            | Crozet Is. (Indian Ocean)        | feathers, feet, beak                                                                            | No                    | 2           |
| Subtropical Rockhopper ( <i>Eudyptes chrysocome moseleyi</i> )    | adult            | St Paul Is. (Indian Ocean)       | feathers, feet, beak                                                                            | No                    | 2           |
| Erect-crested Penguin ( <i>Eudyptes sclateri</i> )                | adult            | New Zealand                      | feathers, feet, beak                                                                            | No                    | 1           |
| Little Penguin ( <i>Eudyptula minor</i> )                         | adult            | New Zealand                      | feathers, feet, beak                                                                            | No                    | 2           |
| Galapagos Penguin ( <i>Spheniscus mendiculus</i> )                | adult            | Galapagos Is. (Equator)          | feathers, feet, beak                                                                            | No                    | 2           |
| Jackass Penguin ( <i>Spheniscus demersus</i> )                    | adult            | Cape of Good Hope (South Africa) | feathers, feet, beak                                                                            | No                    | 2           |
| Peruvian Penguin ( <i>Spheniscus humboldti</i> )                  | adult            | Chile (South America)            | feathers, feet, beak                                                                            | No                    | 2           |
| Yellow-eyed Penguin ( <i>Megadyptes antipodes</i> )               | adult            | Campbell Is (New Zealand)        | feathers, feet, beak                                                                            | No                    | 1           |



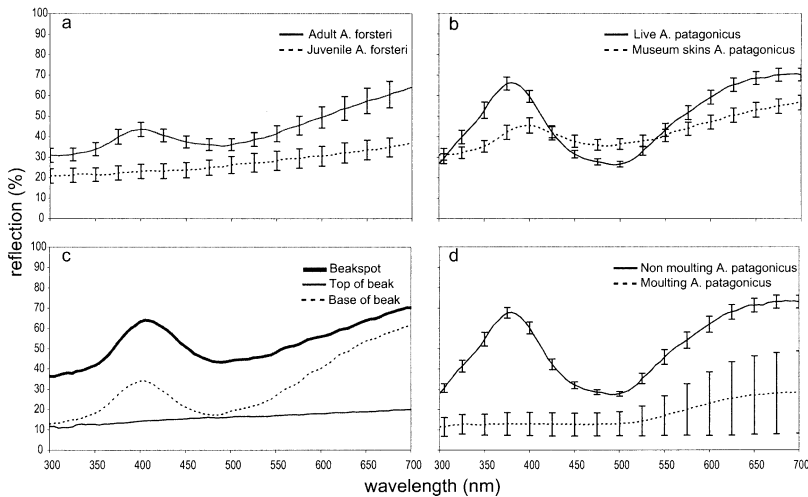

FIGURE 3. UV-reflectance peaks were: a) present in adults large penguins and absent in immature museum skins (shown here in Emperor Penguins), b) 13% higher in living King Penguins than in museum skins, c) variable according to the place on the lower mandible (high reflectance on the spot, medium near the posterior end of the beak, null at the top of the beak, and d) absent in molting birds. Curves depict an average reading from all measured individuals (see Table 1 and text). Error bars represent standard error of the mean.

ation and for assisting our measurements of captive birds. For their excellent assistance in the field, we thank Florence Hesters and Marion Nicolaus. We are particularly grateful to Marc Thery for preliminary measurements at MNHN. We thank two anonymous referees and Isabelle Coolen for their comments on versions of the manuscript. Logistical and financial support for observations in the field was provided by the Institut Polaire Français (IPEV) and by the U.S. National Science Foundation (Grant #OPP0128913 to PMN and FSD). Our field study was approved by the Ethical Committee of IPEV and the IACUC of Auburn University.

#### LITERATURE CITED

- ANDERSSON, S. 1996. Bright ultraviolet coloration in the Asian Whistling-thrushes (*Myiophonus* spp.). *Proceedings of the Royal Society of London Series B* 263:843–848.
- BENNETT, A. T. D., AND I. C. CUTHILL. 1994. Ultraviolet vision in birds: what is its function? *Vision Research* 34:1471–1478.
- BENNETT, A. T. D., I. C. CUTHILL, J. C. PARTRIDGE, AND E. J. MAYER. 1996. Ultraviolet vision and mate choice in zebra finches. *Nature* 380:433–435.
- BOWMAKER, J. K., AND G. R. MARTIN. 1985. Visual pigments and oil droplets in the penguin, *Spheniscus humboldti*. *Journal of Comparative Physiology A* 156:71–77.
- BRADBURY, J. B., AND S. L. VEHCAMP. 1998. Principles of animal communication. Sinauer Associates Inc., Sunderland, MA.
- CHEN, D., J. COLLINS, AND T. GOLDSMITH. 1984. The ultraviolet receptor of bird retinas. *Science* 225:338–339.
- CUTHILL, I. C., J. C. PARTRIDGE, AND A. T. D. BENNETT. 2000a. Avian UV vision and sexual selection, p. 61–82. *In* Y. Espmark, T. Amundsen, and G. Rosenqvist [EDS.], *Animal signals: signaling and signal design in animal communication*. Tapir Academic Press, Trondheim, Norway.
- CUTHILL, I. C., J. C. PARTRIDGE, A. T. D. BENNETT, S. C. CHURCH, N. S. HART, AND S. HUNT. 2000b. Ultraviolet vision in birds. *Advances in the Study of Behavior* 29:159–214.
- DOUCET, S. M. 2002. Structural plumage coloration, male body size, and condition in the Blue-black Grassquit. *Condor* 104:30–38.
- EATON, M. D., AND S. M. LANYON. 2003. The ubiquity of avian ultraviolet plumage reflectance. *Proceedings of the Royal Society of London Series B* 270:1721–1726.
- ENDLER, J. A. 2000. On the measurement and classification of colour in studies of animal colour patterns. *Biological Journal of Linnean Society* 41:315–352.
- FINGER, E., AND D. BURKHARDT. 1994. Biological aspects of bird coloration and avian colour vision including the ultraviolet range. *Vision Research* 34:1509–1514.
- HAUSMANN, F., K. E. ARNOLD, N. J. MARSHALL, AND I. P. F. OWENS. 2003. Ultraviolet signals in birds are special. *Proceedings of the Royal Society of London Series B* 270:61–67.
- HILL, G. E. 1991. Plumage coloration is a sexually selected indicator of male quality. *Nature* 350:337–339.
- HUNT, S., I. C. CUTHILL, A. T. D. BENNETT, S. C. CHURCH, AND J. C. PARTRIDGE. 2001. Is the UV waveband a special communication channel in

- avian mate choice? *Journal of Experimental Biology* 204:2499–2507.
- HUNT, S., R. M. KILNER, N. E. LANGMORE, AND A. T. D. BENNETT. 2003. Conspicuous, ultraviolet-rich mouth colours in begging chicks. *Proceedings of the Royal Society of London Series B* 270(Suppl.):S25–S28.
- JOHNSEN, A., T. ANDERSSON, J. ÖRNBORG, AND J. T. LIFJELD. 1998. Ultraviolet plumage ornamentation affects social mate choice and sperm competition in bluethroats (Aves: *Luscinia S. svecica*): a field experiment. *Proceedings of the Royal Society of London Series B* 265:1313–1318.
- JONES, I. H., AND F. M. HUNTER. 1993. Mutual sexual selection in a monogamous seabird. *Nature* 362: 238–239.
- JOUVENTIN, P. 1982. Visual and vocal signals in penguins, their evolution and adaptive characters. Paul Parey, Berlin, Germany.
- JOUVENTIN, P., P. M. NOLAN, F. S. DOBSON, AND M. NICOLAUS. In press. Colored patches influence pairing in King Penguins. *Ibis*.
- KEYSER, A. J., AND G. E. HILL. 1999. Condition-dependent variation in the blue-ultraviolet coloration of a structurally-based plumage ornament. *Proceedings of the Royal Society of London Series B* 270:2057–2063.
- KOORYMAN, G. L., AND T. G. KOORYMAN. 1995. Diving behavior of Emperor Penguins nurturing chicks at Coulman Island, Antarctica. *Condor* 97:536–549.
- KOORYMAN, G. L., Y. CHEREL, Y. LE MAHO, J. P. CROXALL, P. H. THORSON, V. RIDOUX, AND C. A. KOORYMAN. 1992. Diving behavior and energetics during foraging cycles in King Penguins. *Ecological Monographs* 62:143–163.
- MADDOCKS, S. A., S. C. STUART, AND I. C. CUTHILL. 2001. The effects of the light environment on prey choice by Zebra Finches. *Journal of Experimental Biology* 204:2509–2515.
- MADDOCKS, S. A., A. R. GOLDSMITH, AND I. C. CUTHILL. 2002. Behavioural and physiological effects of absence of ultraviolet wavelengths on European starlings *Sturnus vulgaris*. *Journal of Avian Biology* 33:103–106.
- MASSARO, M., L. S. DAVIS, AND J. T. DARBY. 2003. Carotenoid-derived ornaments reflect parental quality in male and female Yellow-Eyed Penguins *Megadyptes antipodes*. *Behavioural Ecology and Sociobiology* 55:169–175.
- ÖDEEN, A., AND O. HÅSTAD. 2003. Complex distribution of avian color vision systems revealed by sequencing the SWSI opsin from total DNA. *Molecular Biology and Evolution* 20:855–861.
- PETERS, A., A. G. DENK, K. DELHEY, AND B. KEMPE-NAERS. 2004. Carotenoid-based bill colour as an indicator of immunocompetence and sperm performance in male Mallards. *Journal of Evolutionary Biology* 17:1111–1120.
- SHAWKEY, M. D., A. M. ESTES, L. M. SIEFFERMAN, AND G. E. HILL. 2003. Nanostructure predicts intraspecific variation in ultraviolet-blue plumage colour. *Proceedings of the Royal Society of London Series B* 270:1455–1460.
- SHELDON, B. C., S. ANDERSSON, S. C. GRIFFITH, J. ÖRNBORG, AND J. SENDECKA. 1999. Ultraviolet colour variation influences Blue Tit sex ratios. *Nature* 402:874–877.
- SITTARI, H., AND E. HUHTA. 2002. Individual color variation and male quality in pied flycatchers (*Ficedula hypoleuca*) a role of ultraviolet reflectance. *Behavioral Ecology* 6:737–741.
- TREMBLAY, Y., AND Y. CHEREL. 1999. Synchronous underwater foraging behavior in penguins. *Condor* 101:179–185.
- VEIGA, J. P. 1993. Badge size, phenotypic quality, and reproductive success in the House Sparrow: a study on honest advertisement. *Evolution* 47: 1161–1170.
- WILKIE, S. E., P. R. ROBINSON, T. W. CRONIN, S. POOPALASUNDARAM, J. K. BOWMAKER, AND D. M. HUNT. 2000. Spectral tuning of avian violet- and ultraviolet-sensitive visual pigments. *Biochemistry* 39:7895–7901.
